# Supplementary material for: Impact of the COVID-19 Pandemic on Sedentary Time and Behaviour in Children and Adults: A Systematic Review and Meta-Analysis
Source: MDPI journal article supplement (doi:10.3390/ijerph182111286), 2021-10-27
Supplement: s1 [file s1]

# **Impact of the COVID-19 Pandemic on Sedentary Time and Behaviour in Children and Adults: A Systematic Review and Meta-Analysis**

## **Search Terms:**

"Sedentary behav\*" OR "Sedentary time" OR "sedent\*" OR "physical inactiv\*" OR "physical inactiv\*" OR "screen time" OR "screen use" OR "screen view\*" OR "sitting" OR "prolonged sitting" OR "sedentary postur"

AND

"Coronavirus" OR "corona-virus" OR "COVID-19" OR "Covid19" OR "SARS-CoV\*" OR "SARSCov2" OR "SARSCOV2" OR "2019 coronavirus" OR "2019 corona virus" OR "novel corona virus" OR "2019-nCoV" OR "nCoV\*" OR "ncov"

**Table 1.** Risk of Bias Table – Child studies.

| Reference               | Detection Bias |                                                   | Attrition Bias |                                         | Selection Bias |                                                  | Performance Bias |                                                               | Selective Reporting Bias |                                     | Other Sources of Bias |                                                             | GRADE Score |
|-------------------------|----------------|---------------------------------------------------|----------------|-----------------------------------------|----------------|--------------------------------------------------|------------------|---------------------------------------------------------------|--------------------------|-------------------------------------|-----------------------|-------------------------------------------------------------|-------------|
|                         | Rating         | Rationale for rating                              | Rating         | Rationale for rating                    | Rating         | Rationale for rating                             | Rating           | Rationale for rating                                          | Rating                   | Rationale for rating                | Rating                | Rationale for rating                                        |             |
| Kang et al. [20]        | Mod            | Subjectively measured via questionnaires          | Low            | 92.1% of questionnaires had valid data  | Low            | Randomised sample recruited from 49 schools      | Mod.             | Used the IPAQ-Short Form                                      | Low                      | Outcomes reported in specified ways | High                  | Also considered mental health and PA levels                 | Mod.        |
| Lu et al. [21]          | Mod.           | Subjectively measured via questionnaires          | Low            | 91.6% of eligible children participated | Low            | Sampled from ten local schools                   | Mod.             | Used IPAQ-Short Form                                          | Low                      | Outcomes reported in specified ways | Low                   | Also considered participants mental health and demographics | High        |
| Garcia et al. [27]      | Mod            | Subjectively measured using recall questionnaires | Not Clear      | Only included participants reported     | Mod.           | All recruited from the same private school       | Mod.             | Subjectively assessed using recall questionnaires             | Low                      | Outcomes reported in specified ways | Mod.                  | Longitudinal study design                                   | Mod.        |
| Sciberras et al [28]    | Mod.           | Subjectively measured from questionnaires         | Not Clear      | Only completed questionnaires reported  | Mod.           | Recruited from an ongoing longitudinal study     | Mod.             | Assessed using the CoRona-vIruS Health Impact Survey (CRISIS) | Low                      | Outcomes reported in specified ways | High                  | No other covariates considered                              | Mod.        |
| Pietrobelli et al. [29] | Low            | Interview questions – answered by parents         | Low            | 82% of cohort completed both arms       | Mod.           | All recruited from an ongoing longitudinal study | Mod.             | Used two different means of interview techniques              | Low                      | Outcomes reported in specified ways | Mod.                  | Also assessed food habits and PA changes during lockdown    | High        |

|                         |      |                                                         |           |                                                            |      |                                               |      |                                                            |     |                                     |      |                                                                      |       |
|-------------------------|------|---------------------------------------------------------|-----------|------------------------------------------------------------|------|-----------------------------------------------|------|------------------------------------------------------------|-----|-------------------------------------|------|----------------------------------------------------------------------|-------|
| Lopez-Bueno et al. [30] | Mod  | Subjectively measured via questionnaire                 | Not Clear | Only completed questionnaires completed                    | Low  | Randomised sample from social media platforms | Mod. | Used the physical activity vital sign (PAVS) questionnaire | Low | Outcomes reported in specified ways | High | No other covariates considered in analyses                           | Low   |
| Medrano et al. [31]     | Mod. | Subjectively measured via questionnaires                | High      | Only 42.1% of participants followed longitudinally         | Mod. | Recruited from on-going longitudinal study    | Mod. | Used the youth PA (YPA) questionnaire                      | Low | Outcomes reported in specified ways | High | No other covariates considered                                       | Low   |
| Palladino et al. [32]   | Mod. | Sample of children with seizures in an Italian Hospital | Not Clear | Only included participants reported                        | Mod. | All recruited from one hospital in Italy      | Mod. | Used questionnaires to assess total screen time            | Low | Outcomes reported in specified ways | Mod. | Correlations run between total sedentary time and seizure likelihood | High` |
| Dutta et al. [33]       | Mod. | Subjectively assessed using questionnaires              | High      | Only 56.5% of questionnaires had valid data                | Low  | Randomised sample from social media platforms | Mod. | Recall questionnaires used to estimate screen time         | Low | Outcomes reported in specified ways | High | No other covariates considered                                       | Mod.  |
| Eyimaya & Irmak [34]    | Mod. | Subjectively measured but completed by parents          | Mod.      | ~70% of all eligible participants completed the survey     | Low  | Distributed to local schools in the area      | Low  | Used parenting practice scale (PPS)                        | Low | Outcomes reported in specified ways | High | No other covariates considered                                       | Mod.  |
| Munasinghe et al. [35]  | Mod  | Subjectively measured using questionnaires              | Not Clear | Only participants in the prospective cohort study reported | Mod. | Sample taken from pre-existing cohort study   | Mod. | Used the PACE + Adolescent Physical Activity Measures      | Low | Outcomes reported in specified ways | High | No other covariates considered                                       | Mod.  |
| Carroll et al. [36]     | Mod. | Part of pre-existing                                    | Not Clear | Only included participants reported                        | Mod  | Sample taken from existing                    | Mod. | Parental recall of child's PA and SB                       | Low | Outcomes reported in                | Mod. | SES and diet also included                                           | Mod.  |

|                        |      | longitudinal study                         |           |                                                            |           | longitudinal study                                     |      |                                                           |     | specified ways                      |      |                                                                                 |      |
|------------------------|------|--------------------------------------------|-----------|------------------------------------------------------------|-----------|--------------------------------------------------------|------|-----------------------------------------------------------|-----|-------------------------------------|------|---------------------------------------------------------------------------------|------|
| McCor-mack et al. [37] | Mod. | Subjectively measured via questionnaires   | Not Clear | Only completed questionnaires reported                     | Low       | Random sample of adults                                | Mod. | Parental recall of child's PA and sedentary time          | Low | Outcomes reported in specified ways | High | No other covariates considered in analyses                                      | Mod. |
| Schmidt et al. [38]    | Mod. | Subjectively measured from questionnaires  | Not Clear | Only completed questionnaires reported                     | Mod.      | Recruited from an ongoing cohort study (Motorik-Modul) | Mod. | Assessed using the MoMo PA questionnaire                  | Low | Outcomes reported in specified ways | Mod. | Also considered changes in habitual PA and sports activity changes              | Mod. |
| Dunton et al. [39]     | Mod. | Subjectively assessed using questionnaires | Not Clear | Only completed questionnaire data reported                 | High      | Convenience sample                                     | Mod. | Parental recall of the previous days PA and SB            | Low | Outcomes reported in specified ways | Low  | Also considered sex, age, ethnicity, race, employment status of parents and SES | Mod. |
| Mitra et al. [40]      | Mod. | Subjectively measured using questionnaires | Low       | >99% of all participants had full data sets                | Mod.      | Convenience sampling using mass emails                 | Mod. | Used online questionnaires – limited details on specifics | Low | Outcomes reported in specified ways | Mod. | Controlled for age of child and living environment (urban V.S. rural)           | High |
| Moore et al. [41]      | Mod. | Subjectively measured using questionnaires | Low       | 97.9% of all completed questionnaires contained valid data | Not Clear | No specific details on how survey was distributed      | Mod. | Used the participACTION survey                            | Low | Outcomes reported in specified ways | High | No other covariates considered                                                  | High |

|                          |     |                                                       |           |                                           |     |                                                                       |      |                                                                    |     |                                              |      |                                     |      |
|--------------------------|-----|-------------------------------------------------------|-----------|-------------------------------------------|-----|-----------------------------------------------------------------------|------|--------------------------------------------------------------------|-----|----------------------------------------------|------|-------------------------------------|------|
| Francisco<br>et al. [42] | Mod | Subjectively<br>measured<br>using ques-<br>tionnaires | Not Clear | Only included<br>participants<br>reported | Low | Randomised<br>sample re-<br>cruited from<br>social media<br>platforms | Mod. | Used parental<br>recall to esti-<br>mate child sed-<br>entary time | Low | Outcomes<br>reported in<br>specified<br>ways | High | No other covari-<br>ates considered | Mod. |
|--------------------------|-----|-------------------------------------------------------|-----------|-------------------------------------------|-----|-----------------------------------------------------------------------|------|--------------------------------------------------------------------|-----|----------------------------------------------|------|-------------------------------------|------|

---

Mod. = Moderate, PA = Physical Activity, SB = Sedentary Behaviour, SES = Socioeconomic Status, IPAQ = International Physical Activity Questionnaire.

**Table S2.** Risk of bias and quality assessment for all studies included involving adults and older adults

| Reference                | Detection Bias |                                                                                 | Attrition Bias |                                                                  | Selection Bias |                                                                    | Performance Bias |                                                                                   | Selective Reporting Bias |                                              | Other Sources of Bias |                                                                            | GRADE Score |
|--------------------------|----------------|---------------------------------------------------------------------------------|----------------|------------------------------------------------------------------|----------------|--------------------------------------------------------------------|------------------|-----------------------------------------------------------------------------------|--------------------------|----------------------------------------------|-----------------------|----------------------------------------------------------------------------|-------------|
|                          | Rat-<br>ing    | Rationale for<br>rating                                                         | Rating         | Rationale for<br>rating                                          | Rat-<br>ing    | Rationale for<br>rating                                            | Rat-<br>ing      | Rationale for<br>rating                                                           | Rat-<br>ing              | Rationale for<br>rating                      | Rat-<br>ing           | Rationale for rating                                                       |             |
| Meyer et al.<br>[18]     | Mod.           | Subjectively<br>measured us-<br>ing question-<br>naires                         | Low            | 94.1% of all<br>question-<br>naires con-<br>tained valid<br>data | Mod.           | Convenience<br>sampling us-<br>ing mass<br>emailing                | Mod.             | Used online<br>questionnaires<br>– no details on<br>specific ones<br>used         | Low                      | Outcomes<br>reported in<br>specified<br>ways | Mod.                  | Controlled for lock-<br>down restrictions<br>and mental health<br>outcomes | High        |
| Carrol et al.<br>[36]    | Mod.           | Part of pre-ex-<br>isting longitu-<br>dinal study                               | Not<br>Clear   | Only included<br>participants<br>reported                        | Mod.           | Sample taken<br>from existing<br>longitudinal<br>study             | Mod.             | Recall of seven-<br>day PA                                                        | Low                      | Outcomes<br>reported in<br>specified<br>ways | Mod.                  | SES and diet also in-<br>cluded                                            | Mod.        |
| Zinner et al.<br>[43]    | Mod.           | Subjectively<br>measured<br>from question-<br>naires                            | Not<br>Clear   | Only included<br>participants<br>reported                        | Mod.           | Wrist worn<br>HR monitor-<br>ing from<br>which MET's<br>calculated | Mod.             | HR monitoring                                                                     | Low                      | Outcomes<br>reported in<br>specified<br>ways | Mod.                  | Changes in training<br>regimes, intensity<br>and physical fitness          | Mod.        |
| Rezende et<br>al. [44]   | Low            | Objective (ac-<br>celerometers)<br>and subjective<br>(question-<br>naires) used | Not<br>Clear   | Only included<br>participants<br>reported                        | Mod.           | All recruited<br>from the same<br>hospital in<br>Sao Paulo         | Low              | Used GT3X ac-<br>celerometers<br>and question-<br>naires                          | Low                      | Outcomes<br>reported in<br>specified<br>ways | High                  | No other covariates<br>considered                                          | Mod.        |
| Bivia-Roig<br>et al [45] | Mod.           | Subjectively<br>measured by<br>questionnaires                                   | High           | 67.7% had full<br>data sets                                      | Mod.           | All recruited<br>from mater-<br>nity wards                         | Low              | Used adapted<br>questionnaires<br>for SB and Eu-<br>roQol-5D for<br>mental health | Low                      | Outcomes<br>reported in<br>specified<br>ways | Low                   | HRQoL, Dietary<br>changes and adher-<br>ence to guidelines<br>considered   | Mod.        |
| Werneck et<br>al. [87]   | Mod.           | Subjectively<br>measured                                                        | Low            | 84.9% had full<br>data sets                                      | Low            | Chained sam-<br>pling proce-<br>dure used                          | Mod.             | Used new<br>questionnaire –<br>but good detail                                    | Low                      | Outcomes<br>reported in                      | Low                   | Correlates run for<br>sex, age, region,                                    | High        |

|                               |      | from adapted questionnaire                       |           |                                                        |     |                                                         |      | of measures throughout                                               |     | specified ways                      |      | education, employment & SES                                   |      |
|-------------------------------|------|--------------------------------------------------|-----------|--------------------------------------------------------|-----|---------------------------------------------------------|------|----------------------------------------------------------------------|-----|-------------------------------------|------|---------------------------------------------------------------|------|
| Castaneda-Babarro et al. [25] | Mod. | Subjectively measured using questionnaires       | Low       | 91.3% of participants had full data sets               | Low | Randomised sample of adults recruited                   | Low  | Used IPAQ Short version                                              | Low | Outcomes reported in specified ways | Mod. | Age, height, weight, sex, and employment status also recorded | High |
| Cheval et al. [27]            | Mod. | Subjectively assessed using questionnaires       | High      | 40.3% of participants replied to both questionnaires   | Low | Randomised sample from social media platforms           | Low  | Used IPAQ and sitting focused questions (for SB measure)             | Low | Outcomes reported in specified ways | Low  | Also considered mental & physical health, age, BMI.           | Mod. |
| Colivvicchi et al. [49]       | Mod. | Subjectively assessed using telephone interviews | Not Clear | Only included participants reported                    | Low | Randomised sampling methodology used                    | Mod. | Used recall techniques via telephone interviews                      | Low | Outcomes reported in specified ways | High | No other covariates considered in analyses                    | Mod. |
| Gallé et al. [50]             | Mod. | Subjectively measured using questionnaires       | High      | 0.9% of all students emailed completed the survey      | Low | Recruited from three different universities             | Low  | Used the IPAQ and the adult sedentary behaviour questionnaire (ASBQ) | Low | Outcomes reported in specified ways | High | No other covariates considered in analyses                    | Low  |
| Gornicka et al. [51]          | Mod. | Subjectively measured using questionnaires       | Low       | 92.4% of all questionnaires were retained for analyses | Low | Randomised sample recruited from social media platforms | Mod. | Used the PLifeCOVID-19 questionnaire                                 | Low | Outcomes reported in specified ways | High | No other covariates considered in analyses                    | Mod. |
| Janssen et al. [52]           | Mod. | Subjectively measured via questionnaire          | Not Clear | Only completed questionnaires reported                 | Low | Randomised sample recruited from                        | Mod. | Used the IPAQ on three occasions to track changes in SB              | Low | Outcomes reported in specified ways | High | No other covariates considered in analyses                    | Mod. |

| Physical Activity Measurement and Reporting |              |                                                  |           |                                                 |         |                                                                |              |                                                 |             |                                     |        |                                                                                        |            |
|---------------------------------------------|--------------|--------------------------------------------------|-----------|-------------------------------------------------|---------|----------------------------------------------------------------|--------------|-------------------------------------------------|-------------|-------------------------------------|--------|----------------------------------------------------------------------------------------|------------|
| Author                                      | Study Design | Measurement                                      | Reporting | Sample                                          | Setting | Population                                                     | Intervention | Outcome                                         | Measurement | Reporting                           | Sample | Setting                                                                                | Population |
| Lopez-Beuno et al. [53]                     | Mod.         | Subjectively measured via questionnaire          | Not Clear | Only completed questionnaires reported          | Low     | Randomised sample from social media platforms                  | Mod.         | Adapted pre-existing questionnaires             | Low         | Outcomes reported in specified ways | Mod.   | Also considered education level, underlying health condition, and exposure to COVID-19 | High       |
| Luciano et al. [54]                         | Mod.         | Subjectively measured via questionnaires         | Low       | >95% of all participants had full data sets     | Mod.    | 6 <sup>th</sup> year medical students at an Italian University | Mod.         | IPAQ-Short Form with additional questions added | Low         | Outcomes reported in specified ways | High   | No other covariates considered in analyses                                             | Mod.       |
| Mon-Lopez et al. [55]                       | Mod.         | Subjectively measured using questionnaires       | Not Clear | Only completed questionnaires data reported     | Mod.    | Snowballing technique (of email chains)                        | Mod.         | Used the IPAQ-Short Form                        | Low         | Outcomes reported in specified ways | High   | No other covariates considered                                                         | Low        |
| Richardson et al. [56]                      | Mod.         | Subjectively measured using questionnaires       | Not Clear | Only included participants reported             | Mod.    | Randomised sample from online platforms                        | Mod.         | Used the IPAQ-E                                 | Low         | Outcomes reported in specified ways | High   | No other covariates considered                                                         | Mod        |
| Rodriguez-Larrad et al. [57]                | Mod.         | Subjectively measured from adapted questionnaire | High      | 500,000 surveys sent – 13,754 responses (~2.8%) | Low     | Survey distributed to 16 universities                          | Mod.         | Combination of IPAQ and modified SB questions   | Low         | Outcomes reported in specified ways | High   | No other covariates considered                                                         | Low        |
| Romero-Blanco et al. [58]                   | Mod.         | Subjectively measured from questionnaires        | Not Clear | Only completed responses reported               | Low     | Randomised sample from university students                     | Mod.         | Used IPAQ-Short Form                            | Low         | Outcomes reported in specified ways | Mod.   | Correlates run for health behaviours, diet and anxiety/depression scores               | Mod.       |



|                     |      |                                                                                   |           |                                                                      |      |                                                         |      |                                                                                                                |     |                                     |      |                                                                                                                                        |      |
|---------------------|------|-----------------------------------------------------------------------------------|-----------|----------------------------------------------------------------------|------|---------------------------------------------------------|------|----------------------------------------------------------------------------------------------------------------|-----|-------------------------------------|------|----------------------------------------------------------------------------------------------------------------------------------------|------|
| Rolland et al. [59] | Mod. | Subjectively measured from adapted questionnaire                                  | Low       | Not reported – only complete survey numbers                          | Low  | Randomised sample from social media platforms           | High | Used a newly developed unvalidated questionnaire                                                               | Low | Outcomes reported in specified ways | Low  | Correlates run for age, sex, marital status, employment, education, history of problems with mental health and addiction, SES and diet | Mod. |
| Sañudo et al. [60]  | Mod. | Objectively assessed using smart phone data and subjectively using questionnaires | High      | Only 20/57 (35%) completed both arms of the study                    | Mod. | Randomised sample from student email requests           | Mod. | Objectively assessed using smart phone data and used the IPAQ-Short Form questionnaire                         | Low | Outcomes reported in specified ways | High | No other covariates considered                                                                                                         | Mod. |
| Savage et al. [61]  | Mod. | Subjectively measured using questionnaires                                        | High      | Only 22.6% of initial participants completed all four questionnaires | Mod. | Randomised sample from student email requests           | Mod. | Exercise vital sign (EVS) questionnaire<br>Warwick-Edinburgh Mental Well-Being Scale<br>Perceived Stress Scale | Low | Outcomes reported in specified ways | Mod. | Mental health and changes in PA also considered                                                                                        | High |
| Steiger et al. [62] | Mod. | Adapted survey questions to assess total screen time                              | Not Clear | Not reported – only complete survey numbers                          | Low  | Randomised sample recruited from social media platforms | High | Used a newly developed unvalidated questionnaire                                                               | Low | Outcomes reported in specified ways | High | No other covariates considered                                                                                                         | Mod. |
| Alomari et al. [63] | High | Subjectively measured from new questionnaire                                      | Not Clear | Not reported – only complete survey numbers                          | Low  | Randomised sample recruited from                        | High | Used a newly developed unvalidated questionnaire                                                               | Low | Outcomes reported in specified ways | Low  | Assessed strength of associations against BMI, education & income                                                                      | Mod. |

|                          |      |                                             |           |                                             |      |                                                                             |      |                                                                                |     |                                     |      |                                                                                          |      |
|--------------------------|------|---------------------------------------------|-----------|---------------------------------------------|------|-----------------------------------------------------------------------------|------|--------------------------------------------------------------------------------|-----|-------------------------------------|------|------------------------------------------------------------------------------------------|------|
| Chawla et al. [64]       | Mod. | Subjectively measured using questionnaires  | Mod.      | 77% of population responded to survey       | Mod. | social media platforms<br>Sample of medical students at a Indian University | Mod. | Used the WHO QOL-BREF questionnaire                                            | Low | Outcomes reported in specified ways | High | No other covariates considered                                                           | Mod. |
| Hussain & Ashkanani [65] | Mod. | Subjectively measured using questionnaires  | Mod.      | 81.4% of respondents provided reliable data | Low  | Randomly recruited via online distribution                                  | Low  | Used adapted questionnaires                                                    | Low | Outcomes reported in specified ways | High | No other covariates considered in analyses                                               | Mod. |
| Ismail et al. [66]       | Mod. | Subjectively measured via questionnaire     | Not Clear | Only completed questionnaires reported      | Low  | Randomised sample recruited from social media platforms                     | Mod. | IPAQ-Short Form with a screen time question added                              | Low | Outcomes reported in specified ways | Mod. | Also considered dietary changes, Stress, Irritability and Sleep                          | High |
| Ismail et al. [67]       | Mod. | Subjectively measured via questionnaire     | Not Clear | Only completed questionnaires reported      | Low  | Randomised sample recruited from social media platforms                     | Mod. | IPAQ-Short Form with a screen time question added                              | Low | Outcomes reported in specified ways | Mod. | Also considered dietary changes, Stress, Irritability and Sleep                          | High |
| Qi et al. [68]           | Mod. | Subjectively measured using a questionnaire | Not Clear | Only completed questionnaires reported      | Mod. | Randomised sample from text invites through phone network                   | Mod. | Used the IPAQ-Short Form and the SF-8 to assess health related quality of life | Low | Outcomes reported in specified ways | Mod. | Also measured health related quality of life, SES, urban/rural living and marital status | High |
| Qin et al. [69]          | Mod. | Subjectively measured from questionnaire    | Not Clear | Only completed questionnaires reported      | Mod. | Randomised sample from phone network and                                    | Mod. | Used the IPAQ-Short Form and the positive and negative                         | Low | Outcomes reported in specified ways | High | No other covariates considered                                                           | Mod. |

| Table 1. Characteristics of the included studies |              |                                            |           |                                        |                   |                                                                     |              |                                                   |           |                                     |         |                                                               |             |
|--------------------------------------------------|--------------|--------------------------------------------|-----------|----------------------------------------|-------------------|---------------------------------------------------------------------|--------------|---------------------------------------------------|-----------|-------------------------------------|---------|---------------------------------------------------------------|-------------|
| Author                                           | Study design | Measurement                                | Reporting | Response rate                          | Loss to follow-up | Recruitment                                                         | Intervention | Assessment                                        | Follow-up | Outcomes                            | Quality | Covariates                                                    | Limitations |
| Rahman et al. [70]                               | Mod.         | Subjectively measured from questionnaire   | Not Clear | Only completed questionnaires reported | Mod.              | Random sample from social media platforms                           | Mod.         | IPAQ-Short Form                                   | Low       | Outcomes reported in specified ways | High    | No other covariates assessed                                  | Mod.        |
| Wang et al. [71]                                 | Mod.         | Subjectively measured from questionnaire   | Mod.      | Response rate of 76.3%                 | Not Clear         | No clear details about how the questionnaire was distributed        | Mod.         | Sedentary time assessed using the IPAQ-Short Form | Low       | Outcomes reported in specified ways | Mod.    | Also considered QoL, dietary behaviours and PA                | High        |
| Yang et al. [72]                                 | Mod.         | Subjectively measured from questionnaires  | Not Clear | Only completed questionnaires reported | Low               | Randomised recruitment from social media platforms                  | Mod.         | Subjectively measured using IPAQ long-form        | Low       | Outcomes reported in specified ways | High    | No other covariates considered                                | Mod.        |
| Yilmaz et al. [73]                               | Mod.         | Subjectively measured using questionnaires | Not Clear | Only completed questionnaires reported | Low               | Recruited through emails or social media platforms                  | High         | No specific details on questionnaires used        | Low       | Outcomes reported in specified ways | Mod.    | Also considered mental health, diet and knowledge of COVID-19 | High        |
| Zheng et al. [74]                                | Mod.         | Subjectively measured from questionnaires  | Not Clear | Only completed surveys reported        | Mod.              | Measured using the sedentary behaviour questionnaire (SBQ) and IPAQ | Mod.         | Used validated, existing questionnaire            | Low       | Outcomes reported in specified ways | High    | No other covariates considered in analyses                    | Mod.        |

|                      |      |                                            |           |                                                          |      |                                                                   |      |                                                                  |     |                                     |      |                                                                     |      |
|----------------------|------|--------------------------------------------|-----------|----------------------------------------------------------|------|-------------------------------------------------------------------|------|------------------------------------------------------------------|-----|-------------------------------------|------|---------------------------------------------------------------------|------|
| Barkley et al. [75]  | Mod. | Subjectively measured from questionnaires  | Low       | 96.3% of eligible participants included                  | Low  | Randomised sample recruited from a mid-western university         | Low  | Used the IPAQ                                                    | Low | Outcomes reported in specified ways | High | No other covariates considered in the analyses                      | Mod. |
| McDowell et al. [76] | Mod. | Subjectively measured via questionnaires   | Not Clear | Only completed questionnaires reported                   | Mod. | Convenience email sampling                                        | Mod. | Online questionnaire – limited                                   | Low | Outcomes reported in specified ways | Mod. | Changes in employment status and demographics added to linear model | Mod. |
| Meyer et al. [77]    | Mod. | Subjectively assessed using questionnaires | Mod.      | 80.3% of all questionnaires contained valid data         | Low  | Random sampling ‘snowballing’ method used                         | Mod. | Used IPAQ-Short Form and adapted COVID specific survey questions | Low | Outcomes reported in specified ways | High | No other covariates considered                                      | Mod. |
| Stephan et al. [78]  | Mod. | Recall questionnaires                      | Not Clear | Only completed questionnaires reported                   | Mod. | Convenience email sampling                                        | Mod. | Online questionnaire – limited                                   | Low | Outcomes reported in specified ways | High | No other covariates considered in analyses                          | Mod. |
| Zajacova et al. [79] | Mod. | Subjectively measured from questionnaires  | Low       | 93.3% of all completed questionnaires had full data sets | Mod. | Used public use data from the Canadian Perspectives Survey Series | Mod. | Used adapted questionnaire                                       | Low | Outcomes reported in specified ways | Mod. | Covariates for age, sex, SES, diet and substance use in analyses    | High |
| Browne et al. [80]   | Low  | Objectively measured using accelerometers  | Low       | 87.5% of participants had valid data                     | Mod. | Recruited from an ongoing study                                   | Low  | Used the GT3X accelerometer                                      | Low | Outcomes reported in specified ways | High | No other covariates considered in analyses                          | Mod. |

|                             |      |                                                  |           |                                             |      |                                                         |       |                                                                       |     |                                     |      |                                                                                                                             |      |
|-----------------------------|------|--------------------------------------------------|-----------|---------------------------------------------|------|---------------------------------------------------------|-------|-----------------------------------------------------------------------|-----|-------------------------------------|------|-----------------------------------------------------------------------------------------------------------------------------|------|
| Malta et al. [81]           | Mod. | Subjectively measured via questionnaires         | Low       | 95.7% of all data had full data sets        | Mod. | Chain sampling procedure                                | Mod.  | Internally validated questionnaire                                    | Low | Outcomes reported in specified ways | High | No other covariates considered in analyses                                                                                  | Mod. |
| Werneck et al. [82]         | Mod  | Subjectively measured from adapted questionnaire | Not Clear | Only completed questionnaires reported      | Low  | Chained sampling procedure used                         | Mod.  | Used new questionnaire – but good detail of measures throughout       | Low | Outcomes reported in specified ways | High | No other covariates considered in analyses                                                                                  | Mod. |
| Reyes-Olavarria et al. [83] | Mod. | Subjectively measured from questionnaire         | Not Clear | Only completed questionnaires reported      | High | Convenience sampling method                             | High. | Used recall questions to assess ST                                    | Low | Outcomes reported in specified ways | High | No other covariates considered                                                                                              | Low  |
| Asiamah et al. [84]         | Mod. | Subjectively assessed using questionnaires       | Not Clear | Not reported – only complete survey numbers | Low  | Randomised sample recruited from social media platforms | Mod.  | Used a newly developed questionnaire which they piloted and validated | Low | Outcomes reported in specified ways | Mod. | Mental health, PA and changes in unhealthy behaviours (smoking, drug and alcohol use) considered                            | High |
| Werneck et al. [46]         | Mod. | Subjectively measured from adapted questionnaire | Low       | 97.4% had full data sets                    | Low  | Chained sampling procedure used                         | Mod.  | Used new questionnaire – but good detail of measures throughout       | Low | Outcomes reported in specified ways | Low  | Covariates for age, sex, education, job status, ethnicity, alcohol and tobacco use, family health, and quarantine adherence | High |

---

Mod. = Moderate, PA = Physical Activity, SB = Sedentary Behaviour, SES = Socioeconomic Status, IPAQ = International Physical Activity Questionnaire
